# Supplementary material for: The variation of intrinsic defects in XTe (X = Ge, Sn, and Pb) induced by the energy positions of valence band maxima
Source: Royal Society of Chemistry journal article supplement (doi:10.1039/d1tc00513h), 2021-01-01
Supplement: d1tc00513h1.pdf [file d1tc00513h1.pdf]

**-SUPPLEMENTARY INFORMATION-**

**The variation of intrinsic defects in XTe (X=Ge, Sn, and Pb) induced by the  
energy positions of valence band maxima**

Haiyang Huo<sup>a</sup>, Yuxiang Wang<sup>a</sup>, Lili Xi<sup>a\*</sup>, Jiong Yang<sup>a\*\*</sup>, Wenqing Zhang<sup>b</sup>

<sup>a</sup> Materials Genome Institute, Shanghai University, Shanghai 200444, China

<sup>b</sup> Department of Physics, Southern University of Science and Technology, Shenzhen, Guangdong  
518055, China

\*: \*\*corresponding authors: [lilyxi@t.shu.edu.cn](mailto:lilyxi@t.shu.edu.cn); [jiongy@t.shu.edu.cn](mailto:jiongy@t.shu.edu.cn)

The chemical potential of the element determines the growth environment of the crystal. The chemical potential of the element in the XTe system can be defined as:

$$\Delta\mu_X = \mu_X - \mu_X^0 \quad \Delta\mu_{Te} = \mu_{Te} - \mu_{Te}^0$$

At the same time, it must meet:

(1) The compound can exist stably:

$$\Delta\mu_X + \Delta\mu_{Te} = \Delta H_f^{XTe}$$

(2) All component elements should be beneficial to the formation of compounds, not pure phase elements:

$$\Delta\mu_X < 0 \quad \Delta\mu_{Te} < 0$$

(3) It also requires no second phase impurities, e.g., in PbTe:

$$3\Delta\mu_{Pb} + \Delta\mu_{Te} < \Delta H_f^{Pb_3Te}$$

Among them,  $\mu_X^0$  is the chemical potential of metal Ge, Sn and Pb respectively,  $\mu_{Te}^0$  is the chemical potential of metal Te, and  $\Delta H_f^{XTe}$  is the enthalpy of formation of XTe. The energies and enthalpies of all second phases compounds based on Materials Informatics Platform<sup>1</sup>. Figure S1 is the chemical potential range of XTe compounds.

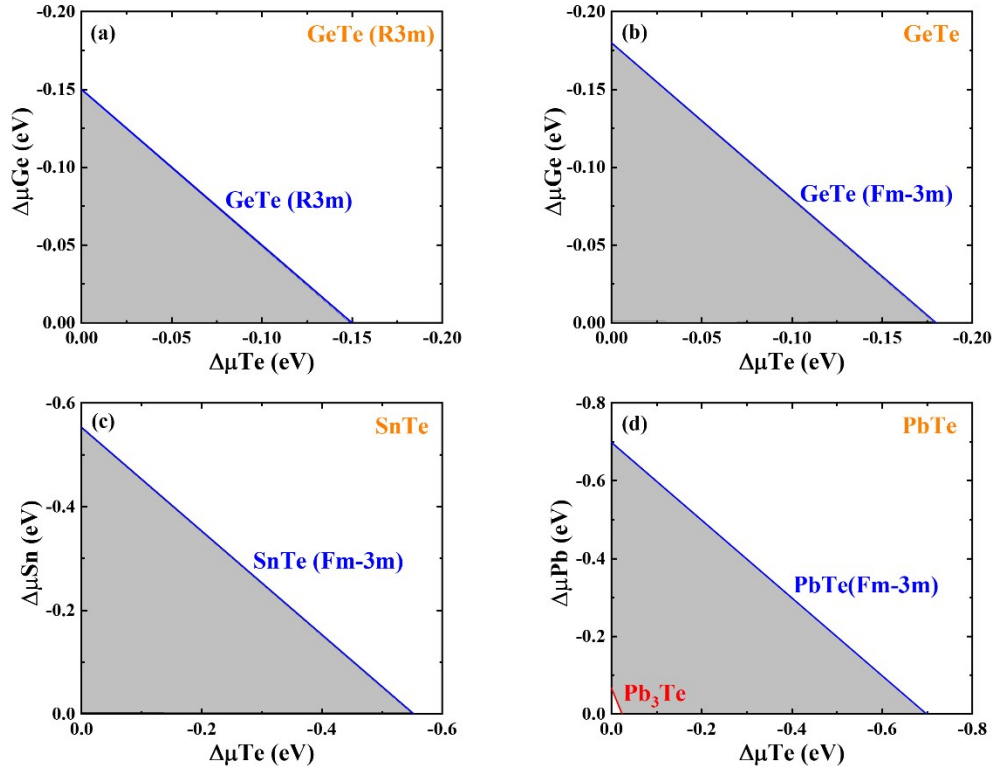

**Fig. S1** Chemical potential range of the XTe compounds. (a) (b) (c) (d) are the chemical potential range of GeTe (R3m), GeTe, SnTe, PbTe, respectively.

**Table S1** The main intrinsic defects of XTe compounds and formation energy ( $E_f=0$ )

| Compounds                 | GeTe(R3m)      |                | GeTe           |                | SnTe           |                | PbTe           |                |
|---------------------------|----------------|----------------|----------------|----------------|----------------|----------------|----------------|----------------|
|                           | Ge-rich        | Ge-poor        | Ge-rich        | Ge-poor        | Sn-rich        | Sn-poor        | Pb-rich        | Pb-poor        |
| $\Delta H_{D, q}$<br>(eV) | $V_{Ge}^{2-}$  | $V_{Ge}^{2-}$  | $V_{Ge}^{2-}$  | $V_{Ge}^{2-}$  | $V_{Sn}^{2-}$  | $V_{Sn}^{2-}$  | $V_{Te}^{2+}$  | $Te_{Pb}^{2+}$ |
|                           | (-0.35)        | (-0.51)        | (-0.13)        | (-0.32)        | (0.18)         | (-0.37)        | (0.05)         | (0.15)         |
|                           | $Te_{Ge}^{2+}$ | $Te_{Ge}^{2+}$ | $Ge_{Te}^{2-}$ | $Te_{Ge}^{2+}$ | $Sn_{Te}^{2-}$ | $Te_{Sn}$      | $Pb_{Te}^{2+}$ | $V_{Pb}^{2-}$  |
|                           | (0.22)         | (-0.09)        | (1.12)         | (0.71)         | (0.80)         | (1.32)         | (0.50)         | (0.59)         |
|                           | $Ge_{Te}^{2-}$ | $Ge_{Te}^{2+}$ | $Te_{Ge}^{2+}$ | $Ge_{Te}^{2-}$ | $V_{Te}^{2+}$  | $Sn_{Te}^{2-}$ | $Pb_I^{2+}$    | $V_{Te}^{2+}$  |
|                           | (0.53)         | (0.84)         | (0.93)         | (1.33)         | (1.473)        | (1.91)         | (0.69)         | (0.72)         |

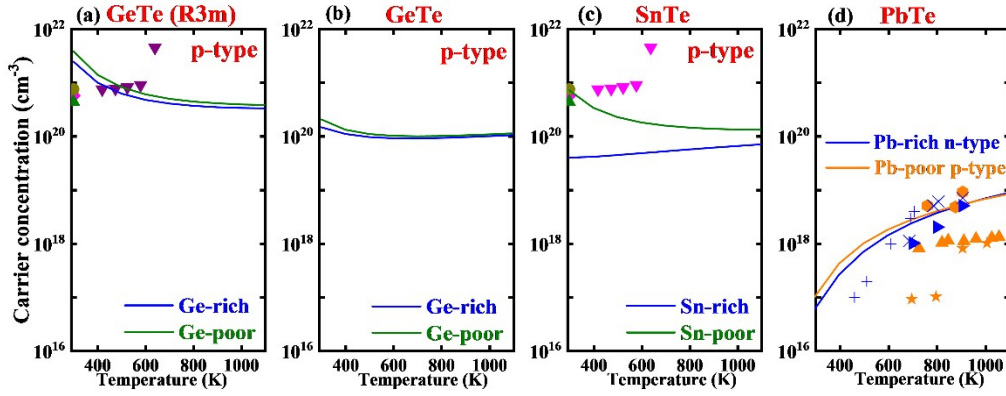

**Fig. S2** Under electrically neutral conditions, calculate the relationship between the carrier concentration and temperature in XTe system. (a) Refs.<sup>2-4</sup>; (c) Refs.<sup>5-7</sup>; (d) Refs.<sup>8-11</sup>

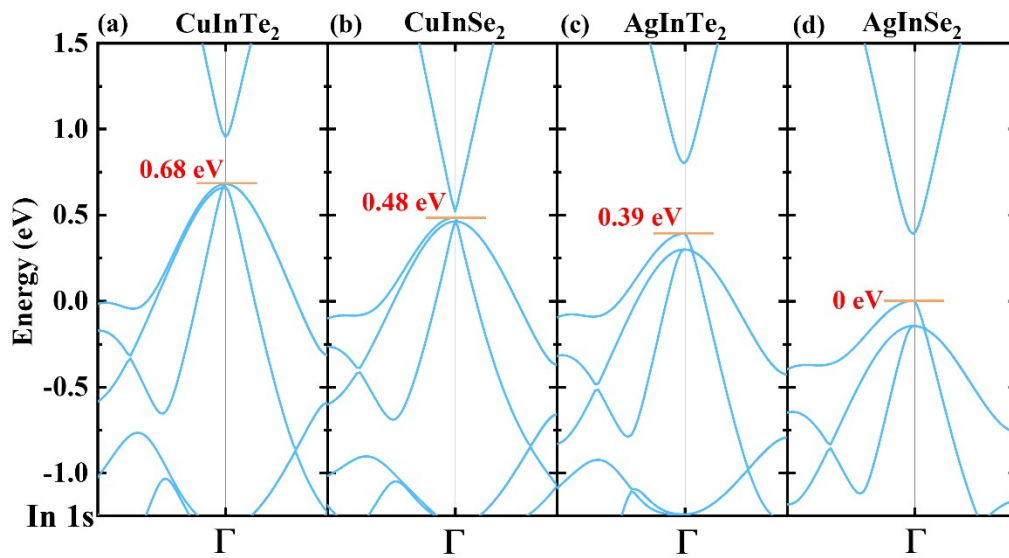

**Fig. S3** The aligned bands of 1:1:2 diamond-like system (CuInTe<sub>2</sub>, CuInSe<sub>2</sub>, AgInTe<sub>2</sub>, AgInSe<sub>2</sub>) based on the In 1s orbitals are shown in (a), (b), (c), (d).

## References:

1. [www.mip3d.org](http://www.mip3d.org)
2. E. Hazan, N. Madar, M. Parag, V. Casian and Y. Gelbstein, *Adv. Electron. Mater.*, 2015, **1**, 1500228.
3. E. M. Levin, *Phys. Rev. B*, 2016, **93**, 045209.
4. Y. Gelbstein, O. Ben-Yehuda, E. Pinhas, T. Edrei, Y. Sadia, Z. Dashevsky and M. P. Dariel, *J. Electron. Mater.*, 2009, **38**, 1478-1482.
5. H. R. Riedl, R. B. Schoolar and B. Houston, *Solid State Commun.*, 1966, **4**, 399-402.
6. K. L. I. Kobayashi, Y. Kato, Y. Katayama and K. F. Komatsubara, *Phys. Rev. Lett.*, 1976, **37**, 772-774.
7. M. Zhou, Z. M. Gibbs, H. Wang, Y. Han, C. Xin, L. Li and G. J. Snyder, *Phys. Chem. Chem. Phys.*, 2014, **16**, 20741-20748.
8. C. R. Hewes, M. S. Adler and S. D. Senturia, *J. Appl. Phys.*, 1973, **44**, 1327-1332.
9. R. F. Brebrick and E. Gubner, *J. Chem. Phys.*, 1962, **36**, 1283-1289.
10. Y. I. Ravich, B. A. Efimova, I. A. Smirnov and L. S. Stil'bans, *Semiconducting Lead Chalcogenides*, Springer US, 1970.
11. H. B. M. Schenk, A. Klimakow, M. Mühlberg and M. Wienecke, *Cryst. Res. Technol.*, 2010, **23**, 77-84.
